# Supplementary material
Source: publisher site journal article supplement (https://www.spandidos-publications.com/1600/downloadSupplementary)

Figure S1. Isolation and purification of active compounds of *Citrus unshiu* peel.

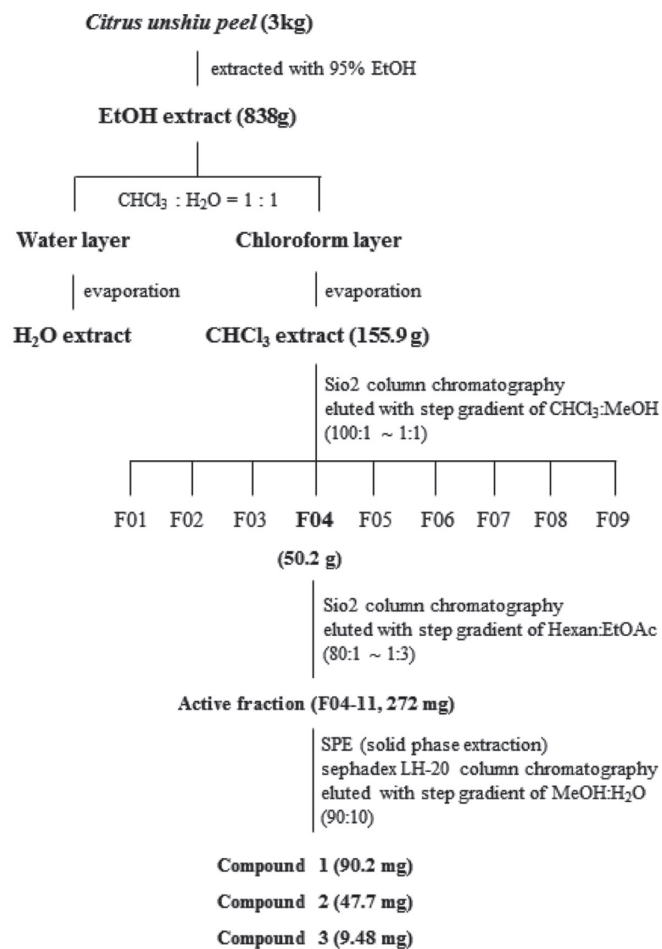

Figure S2. H-NMR and C-NMR spectrum of 3,5,6,7,3',4'-hexamethoxyflavone. (A) H-NMR and (B) C-NMR spectra were recorded at 300 MHz and 75 MHz in CDCl<sub>3</sub>, respectively. H-, proton; C-, carbon; NMR, nuclear magnetic resonance.

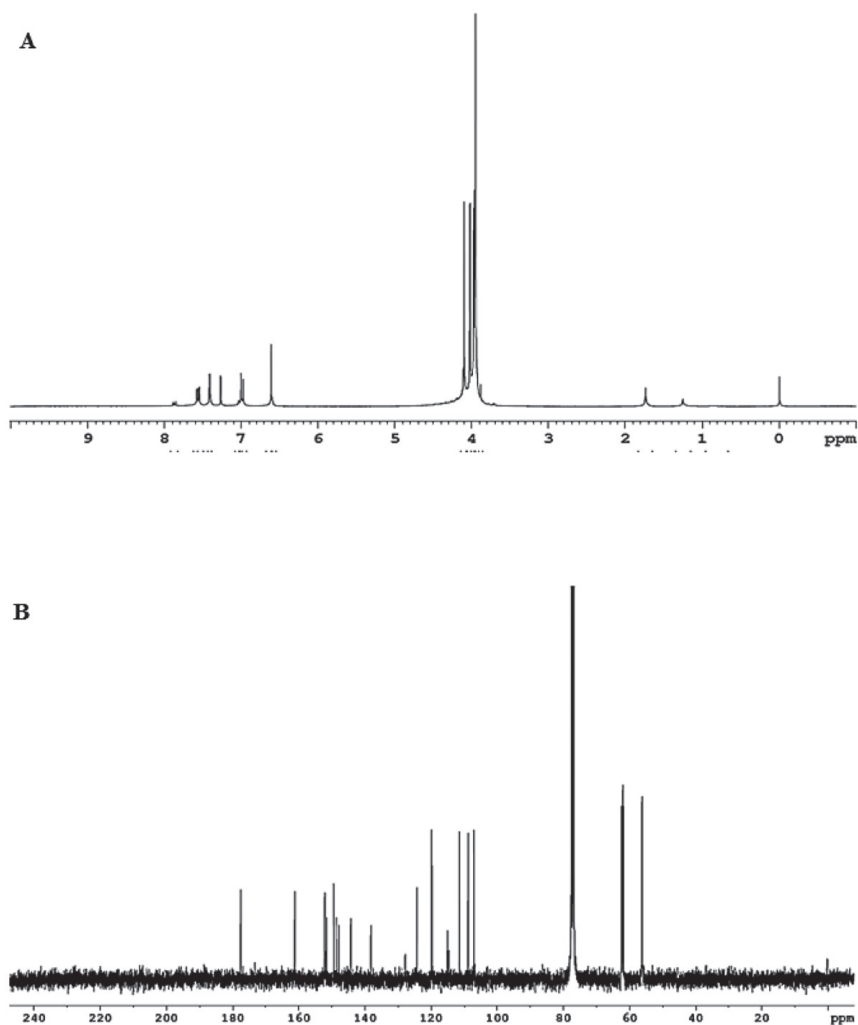

Figure S3. ESI-MS spectrum of 3,5,6,7,3',4'-hexamethoxyflavone. Mass spectrum of 3,5,6,7,3',4'-hexamethoxyflavone has a molecular mass of 402.11 Da. ESI-MS, electrospray ionization mass spectrometry.

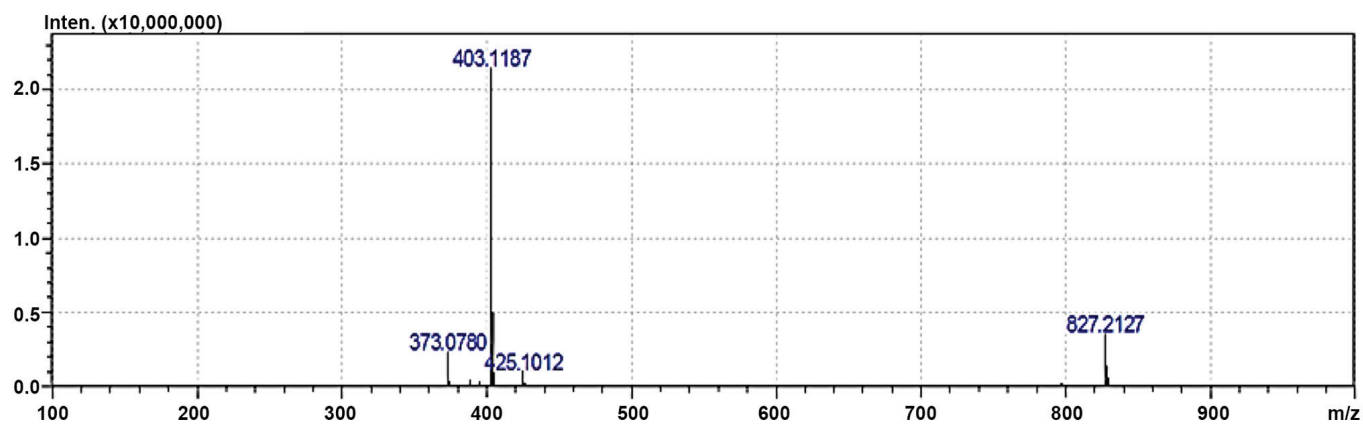

Supplement: Supplementary file 1 [file downloadSupplementary]
